# Supplementary material for: Exploring the Arabidopsis Proteome: Influence of Protein Solubilization Buffers on Proteome Coverage
Source: MDPI journal article supplement (doi:10.3390/ijms16010857), 2014-12-31
Supplement: s1 [file s1]

## Supplementary Information

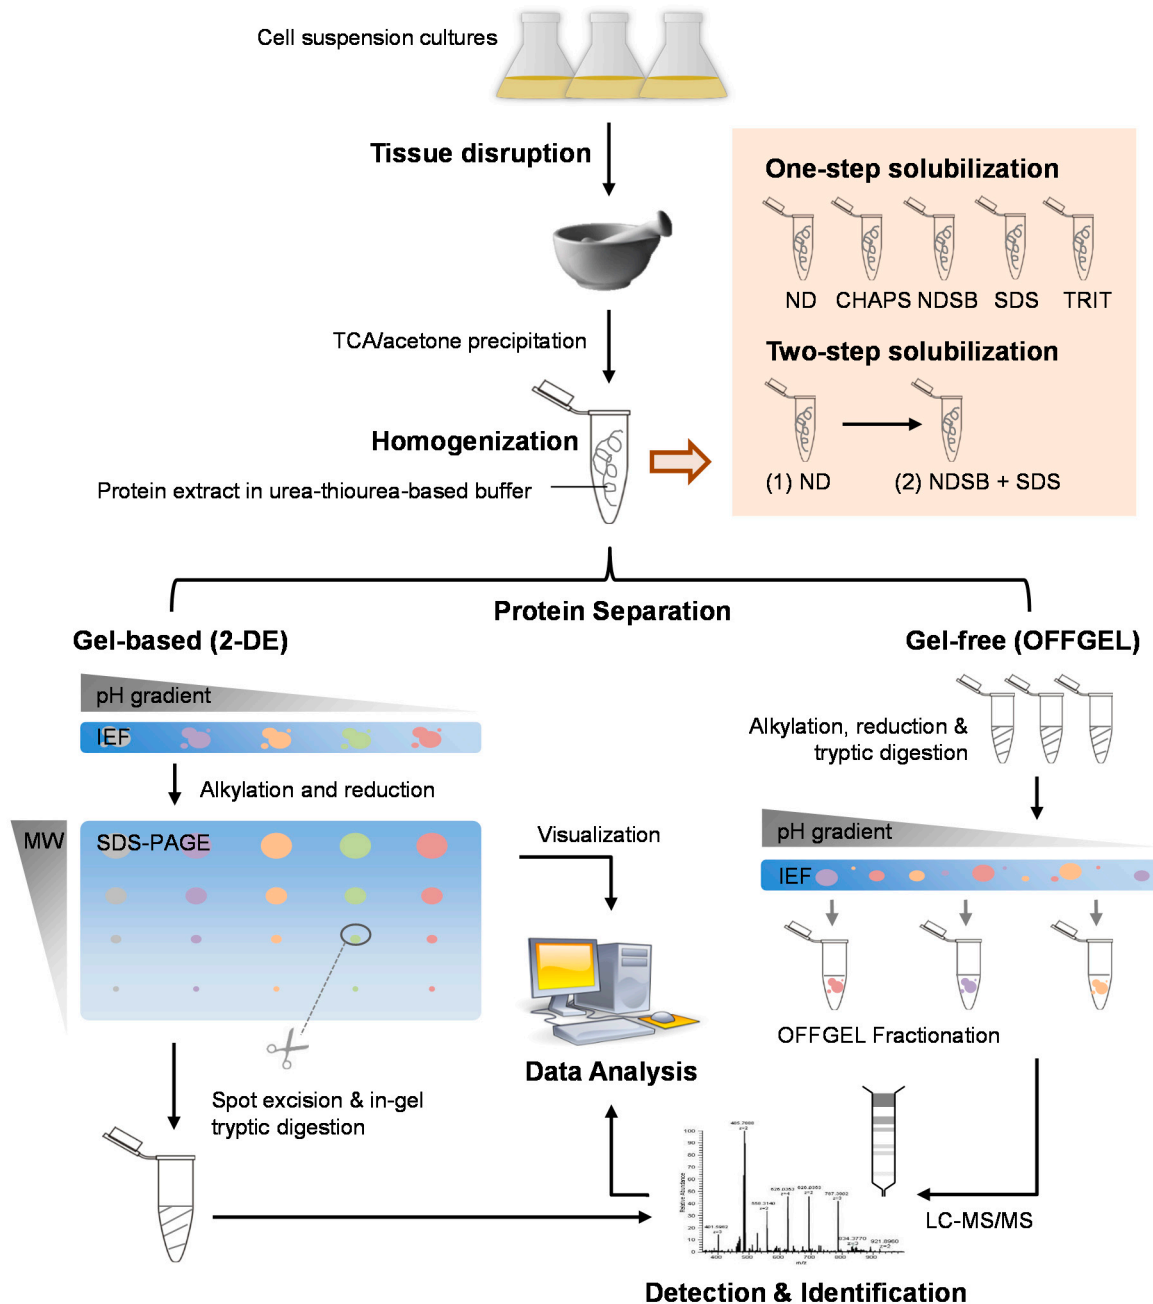

**Figure S1.** Proteins from Arabidopsis cell suspension cultures were extracted using trichloroacetic acid (TCA) in acetone precipitation followed by a one-step solubilization in urea-thiourea lysis buffer containing no detergent (ND), or either 3-[(3-Cholamidopropyl)dimethylammonio]-1-propanesulfonate (CHAPS), non-detergent sulfobetaine 201 (NDSB), sodium dodecyl sulfate (SDS), Triton X-100 (TRIT), or a two-step solubilization process that consists of an initial solubilization in ND-based buffer followed by a second solubilization in NDSB- and SDS-based buffer (orange). Solubilized proteins were separated by either gel-based (2DE) or gel-free (OFFGEL fractionation) methods prior to liquid chromatography-tandem mass spectrometry (LC-MS/MS analysis, identification, and the subsequent data analysis).

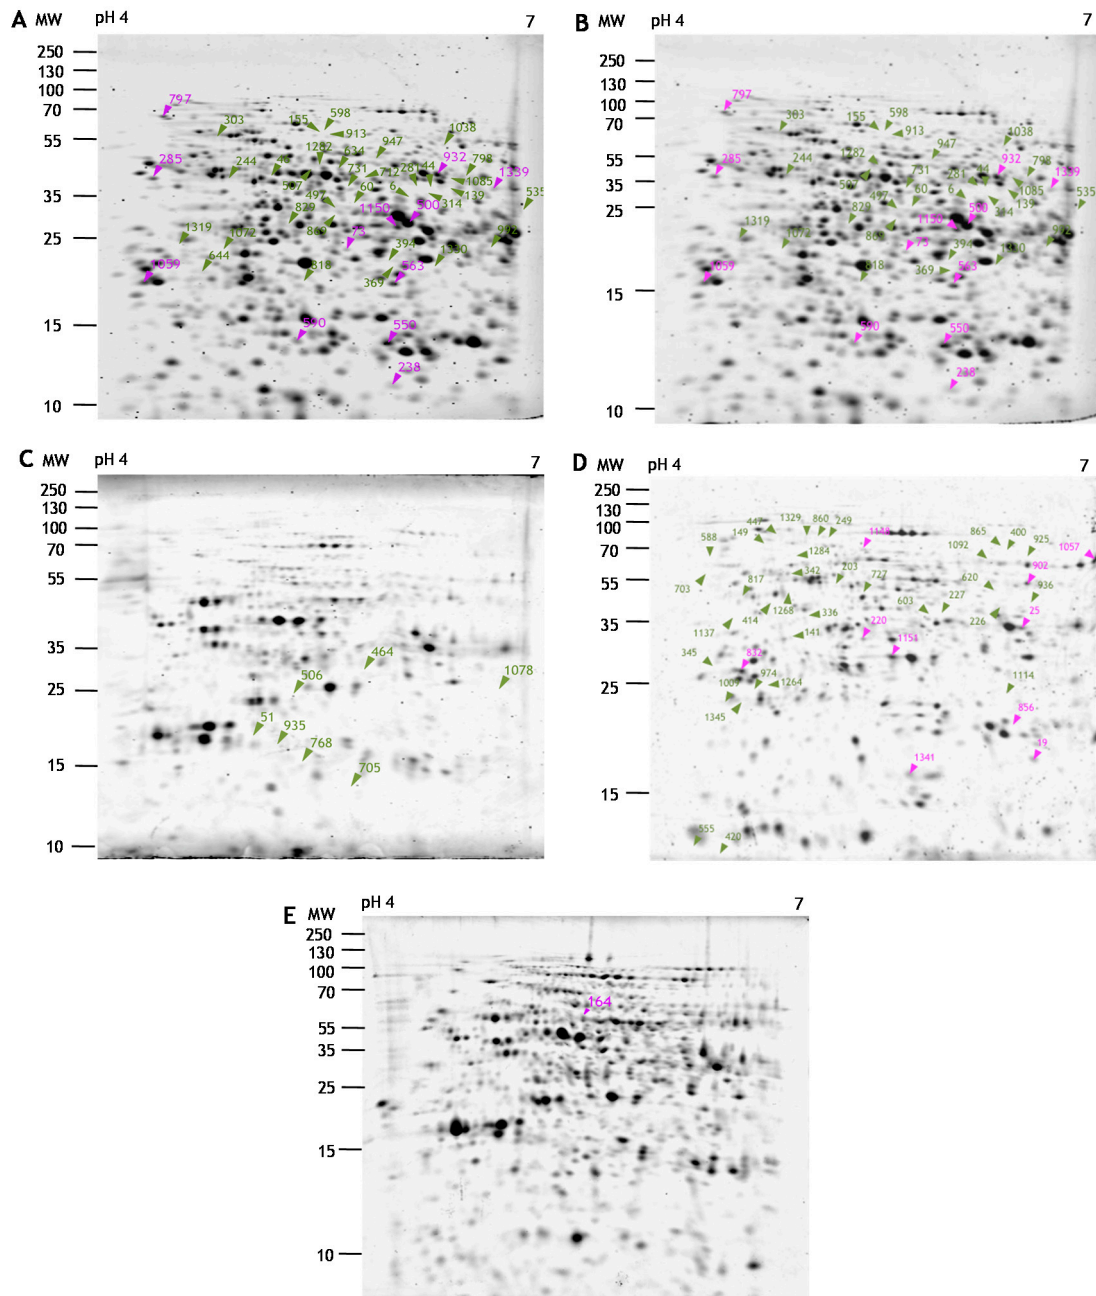

**Figure S2.** Two-dimensional gel electrophoresis (2DE) of protein extracts from *Arabidopsis thaliana* cell suspension cultures. Total soluble proteins (approximately 50  $\mu$ g) from cell suspension culture of *Arabidopsis thaliana* (cv. Columbia 0) were extracted by precipitation with 10% (w/v) trichloroacetic acid (TCA) in acetone and solubilized with 7 M urea and 2 M thiourea buffer containing either no detergent (**A**); 4% (w/v) 3-[(3-cholamido-propyl) dimethylammonio]-1-propanesulfonate (**B**); 4% (w/v) non detergent sulfobetaine 201 (**C**); 2% (v/v) Triton X-100 (**D**) or 1% (w/v) sodium dodecyl sulfate (**E**). Proteins were then resolved by 2DE using 7 cm-long IPG strip pH range 4–7 in the first dimension and 12% SDS-PAGE in the second dimension, visualized by SYPRO Ruby fluorescent stain and comparatively analyzed with the Delta 2D (Decodon) software. Purple and green numbers and arrows show spots present and absent, respectively, only in that particular buffer system.

**Table S1.** Unique protein spots from 2DE identified by LC-MS/MS. CHAPS: 3-[(3-cholamidopropyl) dimethylammonio]-1-propanesulfonate; ND: no detergent; SDS: sodium dodecyl sulfate; TM: transmembrane domain; TRIT: Triton X-100.

| Spot No. | Protein name                               | Accession No.                            | Molecular Weight (Da) | Protein Probability | No. Unique Peptides | Coverage | Peptide Sequences (Charge State)                                                                                                                                        | GRAVY Index/TM | Detergent Specificity |
|----------|--------------------------------------------|------------------------------------------|-----------------------|---------------------|---------------------|----------|-------------------------------------------------------------------------------------------------------------------------------------------------------------------------|----------------|-----------------------|
| 25       | Rubisco activase                           | AT2G39730.1,<br>AT2G39730.2, AT2G39730.3 | 51,982.00             | 99.8%               | 1                   | 3.16%    | EGPPVFEQPEMTYEK (+2)                                                                                                                                                    | -0.308         | TRIT                  |
| 73       | Aldolase superfamily protein               | AT3G52930.1                              | 38,540.40             | 100.0%              | 1                   | 2.51%    | NLNAMNQLK (+2)                                                                                                                                                          | -0.231         | CHAPS                 |
|          | Purin-rich $\alpha$ 1                      | AT2G32080.1,AT2G32080.2                  | 32,201.10             | 99.8%               | 1                   | 5.74%    | TIDSPGQEETGMTGVSK (+2)                                                                                                                                                  | -0.442         |                       |
|          | Arginase                                   | AT4G08900.1                              | 37,345.20             | 98.6%               | 1                   | 3.80%    | DTVDGMTAMVAAK (+2)                                                                                                                                                      | -0.190         |                       |
|          | Selenium-binding protein 1                 | AT4G14030.1, AT4G14030.2                 | 54,058.70             | 100.0%              | 3                   | 9.59%    | DTGFGVSALSSNMIR<br>(+2)/GGPQMIQLSLDGK<br>(+2)/YGGPGYATPLAAMSG<br>PSEK (+2)                                                                                              | -0.273         |                       |
|          | Enolase                                    | AT2G36530.1                              | 47,719.70             | 100.0%              | 4                   | 14.90%   | AGWGVMTSHR (+2)/<br>LAMQEFMILPVGAASF<br>(+2)/MTTECGTEVQIVGDD<br>LLVTNPK (+2, +3)                                                                                        | -0.190         |                       |
|          | ATP synthase $\alpha/\beta$ family protein | AT5G08670.1,<br>AT5G08680.1, AT5G08690.1 | 59,632.20             | 100.0%              | 7                   | 18.70%   | CALVYGQMNEPPGAR<br>(+2)/EMIESGVK (+2)/<br>FEDQEGLPIMTSLEVQDH<br>PTR (+3)/IMNVLGEPIDER<br>(+2)/TIAMDGTEGLVR<br>(+2)/TVLIMELINNVAK<br>(+2)/YDDLSEQSFYMVGGI<br>DEVVAK (+2) | -0.152         | SDS                   |
| 164      | Nitrile specifier protein 1                | AT3G16400.1, AT3G16400.2                 | 51,669.50             | 100.0%              | 3                   | 9.79%    | GGEMGDVWDDGVYENVR<br>(+2)/MVSVGSTLYVFGGR<br>(+2)/VNDMTSEMITFLSIK<br>(+2)                                                                                                | -0.305         |                       |

Table S1. *Cont.*

| Spot No. | Protein name                              | Accession No.            | Molecular Weight (Da) | Protein Probability | No. Unique Peptides | Coverage | Peptide Sequences (Charge State)                                                                                                                                                                          | GRAVY Index/TM        | Detergent Specificity |
|----------|-------------------------------------------|--------------------------|-----------------------|---------------------|---------------------|----------|-----------------------------------------------------------------------------------------------------------------------------------------------------------------------------------------------------------|-----------------------|-----------------------|
| 164      | Cytosol aminopeptidase family protein     | AT2G24200.1, AT2G24200.2 | 54,509.90             | 100.0%              | 4                   | 9.42%    | FDMGGSAAVLGAAK/<br>MPLEESYWEMMK/<br>SGVADMVNTGGR/<br>TGPGCSIELMK                                                                                                                                          | 0.042/TM<br>predicted | SDS                   |
|          | Alanine aminotransferase                  | AT1G17290.1              | 59,823.00             | 100.0%              | 4                   | 8.10%    | AEGAMYLFPCLHLPQK<br>(+2, +3)/GGYMEVTGFTSDVR<br>(+2)/LTAFHQSFMDDEF<br>(+2, +3)/LTAFHQSFMDDEF<br>(+2, +3)                                                                                                   | -0.255                |                       |
|          | Glutamate-cysteine ligase                 | AT4G23100.1, AT4G23100.3 | 58,564.20             | 100.0%              | 2                   | 5.56%    | AVAEEMGIGFLGIGFQPK<br>(+2)/VGTGLDMLLR (+2)                                                                                                                                                                | -0.262                |                       |
|          | Cytosolic enolase                         | AT2G29560.1              | 51,601.10             | 100.0%              | 3                   | 8.84%    | ANMVLPPVPAFTVLSGGK<br>(+2)/ISEALIGMDPK (+2)/<br>LQGQIDQAMIDLK (+2)                                                                                                                                        | -0.205                |                       |
|          | Tubulin $\alpha$ -3                       | AT5G19770.1, AT5G19780.1 | 49,654.00             | 100.0%              | 2                   | 5.33%    | AVISNNTAVAEVFSR<br>(+2)/FDLMYAK (+2)                                                                                                                                                                      | -0.154                |                       |
|          | Insulinase (Peptidase family M16) protein | AT1G51980.1              | 54,403.40             | 100.0%              | 8                   | 24.70%   | AALTSLDMPLQGVSLPPPLA<br>DK (+2)/EAVTATVLQMLM<br>GGGGSFSAGGPGK (+2)/<br>LNGELLEEFMTENFTAAR<br>(+2)/MIAAEDIGR (+2)/<br>MKVEIAELAK (+2)/<br>MVLAASGVEHEELK (+2)/<br>SAVLMNLESR (+2)/<br>TYVPEMVEVLIDSVR (+2) | -0.126                |                       |

Table S1. *Cont.*

| Spot No. | Protein name                                                             | Accession No.                         | Molecular Weight (Da) | Protein Probability | No. Unique Peptides | Coverage | Peptide Sequences (Charge State)                                          | GRAVY Index/TM     | Detergent Specificity |
|----------|--------------------------------------------------------------------------|---------------------------------------|-----------------------|---------------------|---------------------|----------|---------------------------------------------------------------------------|--------------------|-----------------------|
| 220      | ATP synthase $\alpha/\beta$ family protein                               | AT5G08670.1, AT5G08680.1, AT5G08690.1 | 59,714.20             | 100.0%              | 3                   | 8.27%    | IMNVLGEPIDER<br>(+2)/TVLIMELINNVAK<br>(+2)/YDDLSEQSFYMVGGI<br>DEVVAK (+2) | -0.152             | TRIT                  |
| 238      | Rubisco activase                                                         | AT2G39730.1, AT2G39730.2, AT2G39730.3 | 51,982.00             | 99.8%               | 1                   | 3.16%    | EGPPVFEQPEMTYEK (+2)                                                      | -0.308             | CHAPS                 |
| 283      | Lactate/malate dehydrogenase family protein                              | AT1G53240.1                           | 35,805.20             | 100.0%              | 1                   | 4.11%    | SEVVGYMGDDNLAK (+2)                                                       | 0.168/TM predicted | ND                    |
|          | Rubisco activase                                                         | AT2G39730.1, AT2G39730.2, AT2G39730.3 | 51,982.00             | 100.0%              | 1                   | 3.16%    | EGPPVFEQPEMTYEK (+2)                                                      | -0.308             |                       |
| 285      | P-loop containing nucleoside triphosphate hydrolases superfamily protein | AT4G21800.1, AT4G21800.2              | 42,551.90             | 100.0%              | 2                   | 8.18%    | AIEASAEEMYETKY<br>(+2)/DMESSQGGTVVLNTG<br>LK (+2)                         | -0.342             | CHAPS                 |
| 405      | Binding to TOMV<br>RNA 1L (long form)                                    | AT5G04430.1, AT5G04430.2              | 36,019.30             | 100.0%              | 2                   | 7.03%    | AIQQAETMIK (+2)/<br>NIMEITQMTGAR (+2)                                     | -0.473             | ND                    |
|          | Peroxidase superfamily protein                                           | AT2G38380.1                           | 38,109.20             | 100.0%              | 2                   | 6.59%    | AFIDAMIR (+2)/<br>MGNLRPLTGTQGEIR (+3)                                    | 0.036/TM predicted | CHAPS                 |
| 500      | Phosphoserine aminotransferase                                           | AT4G35630.1                           | 47,359.60             | 100.0%              | 3                   | 9.77%    | ASIYNAMPLAGVEK (+2)/<br>DLIGNAQDITPVMLDYK<br>(+2)/SLMNVPTLEK (+2)         | -0.229             |                       |
|          | Isovaleryl-CoA-dehydrogenase                                             | AT3G45300.1                           | 44,774.40             | 100.0%              | 2                   | 6.11%    | GVYVLMGSLDLER<br>(+2)/VADMYTALQSSR (+2)                                   | -0.201             |                       |

Table S1. *Cont.*

| Spot No. | Protein name                                                    | Accession No.                                         | Molecular Weight (Da) | Protein Probability | No. Unique Peptides | Coverage | Peptide Sequences (Charge State)                 | GRAVY Index/TM | Detergent Specificity |
|----------|-----------------------------------------------------------------|-------------------------------------------------------|-----------------------|---------------------|---------------------|----------|--------------------------------------------------|----------------|-----------------------|
| 550      | 20S proteasome $\beta$ subunit D1                               | AT3G22630.1                                           | 22,541.00             | 100.0%              | 1                   | 6.86%    | SDMSVEEAIELVDK (+2)                              | -0.034         | CHAPS                 |
|          | Glutathione S-transferase phi 8                                 | AT2G47730.1                                           | 29,232.60             | 99.4%               | 1                   | 6.84%    | GMFGMTTDPAAVQELEGK (+2)                          | -0.220         |                       |
| 563      | Vacuolar ATP synthase subunit E1                                | AT4G11150.1                                           | 26,060.40             | 100.0%              | 2                   | 10.40%   | IDYSMQLNASR (+2)/<br>VLQAQDDIVNAMK (+2)          | -0.487         | CHAPS                 |
|          | Glyceraldehyde-3-phosphate dehydrogenase C subunit 1            | AT3G04120.1                                           | 36,914.60             | 100.0%              | 2                   | 7.40%    | DAPMFVVGVEHEEYK (+2)/<br>VVDLIVHMSK (+2)         | -0.129         |                       |
| 590      | Adenine nucleotide $\alpha$ hydrolases-like superfamily protein | AT3G11930.1, AT3G11930.2,<br>AT3G11930.3, AT3G11930.4 | 21,457.50             | 100.0%              | 1                   | 5.53%    | MHVDLLVVGSR (+2)                                 | -0.011         | CHAPS                 |
|          | Rubisco activase                                                | AT2G39730.1,<br>AT2G39730.2, AT2G39730.3              | 51,982.00             | 100.0%              | 1                   | 3.16%    | EGPPVFEQPEMTYEK (+2)                             | -0.308         |                       |
| 661      | Actin-related protein 7                                         | AT3G60830.1                                           | 39,904.50             | 100.0%              | 2                   | 9.09%    | AGAAIPDQSPAMIIPSQMK (+2)/<br>TNPSMNLSMSDVEK (+2) | -0.171         | ND                    |
| 728      | 14-3-3 $\lambda$ G-box regulating factor 6                      | AT5G10450.1, AT5G10450.2,<br>AT5G10450.3, AT5G10450.4 | 27,976.50             | 99.9%               | 2                   | 11.30%   | AAQDIAAADMAPTHPIR (+3)/<br>TAAEDTMLAYK (+2)      | -0.358         | ND                    |
| 797      | RNA-binding KH domain-containing protein                        | AT3G04610.1                                           | 63,401.40             | 100.0%              | 1                   | 1.91%    | HDSYYPPPEMR (+2)                                 | -0.753         | CHAPS                 |
|          | PDI-like 1-4                                                    | AT5G60640.1                                           | 66,358.60             | 100.0%              | 1                   | 1.51%    | MFHLDPEK (+2)                                    | -0.429         |                       |
| 827      | Vacuolar ATP synthase subunit A                                 | AT1G78900.1, AT1G78900.2                              | 68,814.50             | 100.0%              | 2                   | 4.82%    | DMGYNVSMMDSTSR (+2)/<br>TTLVANTSMPVAAR (+2)      | -0.172         | ND                    |

Table S1. *Cont.*

| Spot No. | Protein name                                                                  | Accession No.            | Molecular Weight (Da) | Protein Probability | No. Unique Peptides | Coverage | Peptide Sequences (Charge State)                                            | GRAVY Index/TM | Detergent Specificity |
|----------|-------------------------------------------------------------------------------|--------------------------|-----------------------|---------------------|---------------------|----------|-----------------------------------------------------------------------------|----------------|-----------------------|
| 832      | Nascent polypeptide-associated complex subunit $\alpha$ -like protein 5       | AT1G33040.1              | 22,780.00             | 100.0%              | 1                   | 6.22%    | DIDLVMTQAGVSK (+2)                                                          | -0.628         | TRIT                  |
|          | Nascent polypeptide-associated complex subunit $\alpha$ -like protein 2       | AT3G49470.1              | 23,711.90             | 100.0%              | 2                   | 10.60%   | DIDLVMTQAGVSR (+2)/<br>MPEIGATSQR (+2)                                      | -0.699         |                       |
|          | Nascent polypeptide-associated complex (NAC), $\alpha$ subunit family protein | AT4G10480.1              | 23,171.60             | 100.0%              | 3                   | 20.80%   | IDDMSSQLQAQAAQR (+2,<br>+3)/LGMKPVTDVSR<br>(+3)/PGPVIEEVNEEALMDA<br>IK (+2) | -0.642         |                       |
| 856      | Glutamine synthetase 1.3                                                      | AT3G17820.1              | 38,595.30             | 100.0%              | 1                   | 6.21%    | GNNILVMCDAYTPAGDPIP<br>TNK (+2)                                             | -0.408         | TRIT                  |
|          | Binding to TOMV RNA 1L (long form)                                            | AT5G04430.1, AT5G04430.2 | 36,019.30             | 97.7%               | 1                   | 3.19%    | AIQQAETMIK (+2)                                                             | -0.473         |                       |
| 902      | ATPase, F1 complex, $\alpha$ subunit protein                                  | AT2G07698.1              | 85,935.70             | 100.0%              | 2                   | 2.45%    | QMSLLLR (+2)/<br>VVDAMGVPIDGK (+2)                                          | -0.066         | TRIT                  |
| 932      | Glutathione reductase                                                         | AT3G54660.1              | 60,853.60             | 100.0%              | 2                   | 4.60%    | DFVGEQMSLR (+2)/<br>INLTPVALMEGGALAK (+2)                                   | -0.137         | CHAPS                 |
|          | Lipoamide dehydrogenase 2                                                     | AT3G17240.1, AT3G17240.3 | 53,986.10             | 100.0%              | 3                   | 7.50%    | AIDTAEGMVK (+2)/<br>EAAMATYDKPIHM (+2)/<br>VSSVEVDLPAMLAQK (+2)             | -0.023         |                       |

Table S1. *Cont.*

| Spot No. | Protein name                                                 | Accession No.            | Molecular Weight (Da) | Protein Probability | No. Unique Peptides | Coverage | Peptide Sequences (Charge State)                                      | GRAVY Index/TM | Detergent Specificity |
|----------|--------------------------------------------------------------|--------------------------|-----------------------|---------------------|---------------------|----------|-----------------------------------------------------------------------|----------------|-----------------------|
| 1057     | Glycosyl hydrolase superfamily protein                       | AT3G09260.1              | 59,722.40             | 100.0%              | 2                   | 5.53%    | HLLSMQEAVCIDK (+2)/<br>MSIAWPR (+2)/<br>YKEDIQLMK (+2, +3)            | −0.442         | TRIT                  |
| 1059     | Calcium-dependent lipid-binding (CaLB domain) family protein | AT1G23140.1              | 18,568.90             | 99.7%               | 2                   | 16.40%   | DSNTSDPFVVVTMGSSQK (+2)/ILQDMILQLR (+2)                               | −0.441         | CHAPS                 |
| 1087     | Glyceraldehyde-3-phosphate dehydrogenase C subunit 1         | AT3G04120.1              | 36,914.60             | 100.0%              | 2                   | 7.40%    | DAPMFVVGVNEHEYK (+2)/VVDLIVHMSK (+2)                                  | −0.129         | ND                    |
|          | Vacuolar ATP synthase subunit E1                             | AT4G11150.1              | 26,060.40             | 99.8%               | 2                   | 10.40%   | IDYSMQLNASR (+2)/VLQAQDDIVNAMK (+2)                                   | −0.487         |                       |
|          | Mitochondrial HSO70 2                                        | AT5G09590.1              | 72,992.20             | 100.0%              | 3                   | 7.33%    | EVDEVLLVGGMTR (+2)/GVNPDEAVAMGAALQGGI LR (+2)/IINEPTAAAL SYGMTNK (+2) | −0.306         |                       |
| 1148     | Glycine-rich protein                                         | AT1G27090.1              | 46,017.90             | 100.0%              | 3                   | 9.05%    | IMASDYFTTTPPEMK (+2)/ITQMEESISQGK (+2)/SQNEFTSIMLTR (+2)              | −0.825         | TRIT                  |
|          | Vacuolar ATP synthase subunit A                              | AT1G78900.1, AT1G78900.2 | 68,814.50             | 100.0%              | 3                   | 7.54%    | DMGYNVSMMDSTSR (+2)/LAEMPADSGYPAYLAAR (+2)/TTLVANTSNNMPVAAR (+2)      | −0.172         |                       |



Table S1. *Cont.*

| Spot No. | Protein name                                       | Accession No.                            | Molecular Weight (Da) | Protein Probability | No. Unique Peptides | Coverage | Peptide Sequences (Charge State)                                | GRAVY Index/TM        | Detergent Specificity |
|----------|----------------------------------------------------|------------------------------------------|-----------------------|---------------------|---------------------|----------|-----------------------------------------------------------------|-----------------------|-----------------------|
| 1150     | GTP binding elongation factor Tu family protein    | AT4G02930.1                              | 49,410.20             | 100.0%              | 2                   | 5.29%    | LMDAVDEYIPDPVR (+2)/<br>STVTGVEMFK (+2)                         | -0.117                | CHAPS                 |
|          | Peroxidase superfamily protein                     | AT2G38380.1                              | 38,109.20             | 100.0%              | 2                   | 6.59%    | AFIDAMIR (+2)/<br>MGNLRPLTGTQGEIR (+3)                          | 0.036/TM<br>predicted |                       |
| 1151     | PYK10-binding protein 1                            | AT3G16420.1,<br>AT3G16420.2, AT3G16420.3 | 32,158.20             | 100.0%              | 1                   | 4.36%    | IFGSDGSVITMLR (+2)                                              | -0.303                | TRIT                  |
|          | Rubisco activase                                   | AT2G39730.1,<br>AT2G39730.2, AT2G39730.3 | 51,982.00             | 100.0%              | 1                   | 3.16%    | EGPPVFEPQEMTYEK (+2)                                            | -0.308                |                       |
| 1165     | Triosephosphate isomerase                          | AT3G55440.1                              | 27,168.20             | 100.0%              | 1                   | 5.51%    | EAGSTMDVVAAQTK (+2)                                             | 0.076                 | ND                    |
|          | Glutathione S-transferase PHI 10                   | AT2G30870.1                              | 24,230.60             | 99.2%               | 1                   | 6.05%    | GVSFETVNVDLMK (+2)                                              | -0.075                |                       |
| 1190     | Ferretin 1                                         | AT5G01600.1                              | 28,178.10             | 100.0%              | 1                   | 5.88%    | GDALYAMELALSLEK (+2)                                            | -0.253                | ND                    |
|          | Aluminium induced protein with YGL and LRDR motifs | AT4G27450.1                              | 27,623.00             | 99.8%               | 1                   | 5.20%    | TTNEAMFVIEAYR (+2)                                              | -0.099                |                       |
|          | Glutathione S-transferase PHI 10                   | AT2G30870.1                              | 24,230.60             | 98.8%               | 1                   | 6.05%    | GVSFETVNVDLMK (+2)                                              | -0.075                |                       |
| 1339     | Lipoamide dehydrogenase 2                          | AT3G17240.1, AT3G17240.3                 | 53,986.10             | 100.0%              | 2                   | 4.93%    | AIDTAEGMVK (+2)/<br>VSSVEVDLPAMLAQK (+2)                        | -0.023                | CHAPS                 |
| 1341     | Rotamase CYP 4                                     | AT3G62030.1,<br>AT3G62030.2, AT3G62030.3 | 28,208.10             | 100.0%              | 2                   | 9.23%    | HVVFGQVIEGMK (+2)/<br>IVMGLFGEVVPK (+2)                         | -0.170                | TRIT                  |
|          | Double Clp-N motif protein                         | AT4G25370.1                              | 26,051.10             | 100.0%              | 3                   | 16.80%   | SDMYFFSPEHPPLTEPAQK<br>(+3)/SLAMGELEAR<br>(+2)/SMNEDVDLSFK (+2) | -0.274                |                       |

**Table S2.** Detection of palmitoylation and glycosylphosphatidylinositol modifications to signaling proteins and their buffer system specificity.

| Protein Name                                            | Accession Number | Localization          | TM | Number Palmitoylation Sites (Amino Acid Position/ Prediction Score) | Glycosylphosphatidyl-inositol (Amino Acid Position/ Prediction Score) | Buffer |
|---------------------------------------------------------|------------------|-----------------------|----|---------------------------------------------------------------------|-----------------------------------------------------------------------|--------|
| Small GTPase mediated signal transduction (19 proteins) |                  |                       |    |                                                                     |                                                                       |        |
| <i>Arabidopsis</i> RAS 5                                | AT1G02130        | GA                    | –  | 2 (200/3.843; 201/3.479)                                            | 175/–80.34                                                            | NDSB   |
| <i>Arabidopsis</i> RAC-like 9                           | AT2G44690        | PM                    | –  | 1 (206/1.521)                                                       | 192/–76.2                                                             | NDSB   |
| RAB GTPase homolog A1G                                  | AT3G15060        | Cytosol               | –  | 2 (214/4.033; 215/2.264)                                            | 195/–69.5                                                             | NDSB   |
| RAB GTPase homolog 1C                                   | AT4G17530        | PM, GA                | –  | 2 (199/1.62; 200/3.355)                                             | 178/–787                                                              | NDSB   |
| ARF GTPase-activating protein                           | AT5G13300        | GA, cytosol, vesicles | –  | 1 (827/1.24)                                                        | 801/56.02                                                             | NDSB   |
| Ypt/Rab-GAP domain of gyp1p                             | AT5G41940        | GA                    | 3  | 2 (174/0.433; 225/0.348)                                            | 524/–43.91                                                            | NDSB   |
| ARF-GAP domain 8                                        | AT4G17890        | Nucleus               | 1  | 1 (28/0.509)                                                        | 389/–47.95                                                            | CHAPS  |
| SEC7-like guanine nucleotide exchange protein           | AT1G01960        | Nucleus, cytosol      | 1  | 5 (418/1.579; 1489/0.4; 1722/0.34; 1749/5.6; 1750/4.2)              | 1725/–26.69                                                           | ND     |
| Ypt/Rab-GAP domain of gyp1p                             | AT4G29950        | Cytoplasm             | 2  | 2 (390/0.395; 726/0.34)                                             | 808/–49.45                                                            | ND     |
| RAB GTPase homolog A1E                                  | AT4G18430        | PM, GA                | –  | 2 (214/1.744; 215/2.37)                                             | 195/–81.34                                                            | ND     |
| RAB GTPase homolog C2A                                  | AT5G03530        | GA                    | 1  | 3 (156/0.93; 208/2.6; 209/3.98)                                     | 187/–107.72                                                           | ND     |
| RAB GTPase homolog G3E                                  | AT1G49300        | PM, GA                | –  | –                                                                   | 189/–102.34                                                           | SDS    |
| RAB GTPase homolog B1C                                  | AT4G17170        | PM, GA                | –  | 3 (121/0.34; 209/1.46; 210/2.27)                                    | 194/–80.77                                                            | SDS    |
| RAB GTPase homolog A1C                                  | AT5G45750        | PM, nucleus, vacuole  | –  | 1 (214/2.612)                                                       | 189/–66.66                                                            | SDS    |
| Calcium-dependent ARF-type GTPase activating protein    | AT4G21160        | Nucleus, vacuole      | –  | 1 (53/0.752)                                                        | 306/–71.50                                                            | SDS    |
| GTP-binding 2                                           | AT4G35860        | GA, chloroplast       | –  | 3 (121/0.38; 209/3.4; 210/2.3)                                      | 182/–65.59                                                            | SDS    |

Table S2. *Cont.*

| Protein Name                                                                | Accession Number | Localization       | TM | Number Palmitoylation Sites (Amino Acid Position/ Prediction Score) | Glycosylphosphatidyl-inositol (Amino Acid Position/ Prediction Score) | Buffer |
|-----------------------------------------------------------------------------|------------------|--------------------|----|---------------------------------------------------------------------|-----------------------------------------------------------------------|--------|
| <sup>a</sup> ADP-ribosylation factor-like A1D                               | AT5G67560        | VM                 | –  | 3 (157/1.73; 158/1.51; 163/0.36)                                    | 166/–107                                                              | SDS    |
| RAB GTPase homolog A5E                                                      | AT1G05810        | Chloroplast        | 1  | 3 (4/3.405; 257/2.42; 258/3.314)                                    | 246/–87                                                               | TRIT   |
| Endoplasmic reticulum morphology 1/ GNOM-Like 1                             | AT5G39500        | Chloroplast        | –  | 4 (191/1.037; 1177/0.843; 1208/0.495; 1248/111)                     | 1423/–108.85                                                          | TRIT   |
| <sup>a</sup> Cell surface receptor linked signal transduction (32 proteins) |                  |                    |    |                                                                     |                                                                       |        |
| LRR protein kinase family protein                                           | AT1G06840 *      | Er. PM             | 1  | 2 (21/1.095; 876/0.638)                                             | 921/–30.43                                                            | NDSB   |
| LRR-like protein kinase family                                              | AT5G10020        | PM                 | 1  | 1 (8/3.413)                                                         | 1029/–69.01                                                           | NDSB   |
| KH domain-containing protein                                                | AT1G33680        | Nucleus            | 1  | –                                                                   | 737/–52.61                                                            | NDSB   |
| STRUBBELIG-receptor family 7                                                | AT3G14350 *      | Er. PM             | 1  | 3 (14/0.767; 184/0.32; 672/0.95)                                    | 690/–83.02                                                            | NDSB   |
| Sodium bile acid symporter                                                  | AT3G25410        | Chloroplast        | 10 | 3 (207/0.71; 208/1.74; 391/1.58)                                    | 403/–61.89                                                            | NDSB   |
| Sphingosine kinase 1                                                        | AT4G21540        | Nucleus, vacuole   | 1  | 1 (232/0.319)                                                       | 464/–608                                                              | NDSB   |
| Sec23/Sec24 transport protein                                               | AT3G07100        | COPII vesicle coat | 1  | 1 (754/0.495)                                                       | 1021/–64.04                                                           | CHAPS  |
| STRUBBELIG-receptor family 4                                                | AT3G13065 *      | Er. PM             | 2  | 1 (15/0.576)                                                        | 654/–36.08                                                            | CHAPS  |
| Transmembrane kinase-like 1                                                 | AT3G24660 *      | PM                 | 1  | 4 (21/0.333; 23/0.533; 631/19; 632/0.4)                             | 657/–81.78                                                            | CHAPS  |
| LRR protein kinase family protein                                           | AT2G31880 *      | PM                 | 2  | 3 (134/0.36; 616/0.51; 618/1.33)                                    | 622/–82.67                                                            | CHAPS  |
| LRR protein kinase family protein                                           | AT2G45340 *      | PM                 | 4  | 3 (301/0.51; 446/0.48; 666/0.4)                                     | 670/–47.83                                                            | CHAPS  |

Table S2. *Cont.*

| Protein Name                                  | Accession Number | Localization | TM | Number Palmitoylation Sites (Amino Acid Position/ Prediction Score) | Glycosylphosphatidyl-inositol (Amino Acid Position/ Prediction Score) | Buffer |
|-----------------------------------------------|------------------|--------------|----|---------------------------------------------------------------------|-----------------------------------------------------------------------|--------|
| LRR protein kinase family protein             | AT3G08680 *      | Er. PM       | 1  | 4 (20/1.87; 283/1.7; 283/1.61; 593/0.7)                             | 618/−45.83                                                            | CHAPS  |
| LRR protein kinase family protein             | AT5G51560 *      | PM           | –  | 3 (472/0.63; 676/1.43; 679/2.74)                                    | 657/−55.23                                                            | CHAPS  |
| LRR protein kinase family protein             | AT2G41820 *      | PM           | 1  | 3 (5/4.05; 21/0.338; 865/0.39)                                      | 869/−94.75                                                            | ND     |
| LRR protein kinase family protein             | AT3G56370 *      | PM           | 2  | 4 (334/1.653; 471/0.329; 852/0.39; 953/1.23)                        | 932/−69.84                                                            | ND     |
| Proline-rich extensin-like receptor kinase 10 | AT1G26150        | PM           | 1  | 3 (350/2.719; 351/1.505; 685/0.405)                                 | 740/−88                                                               | ND     |
| Unknown protein                               | AT1G62240        | EM           | 1  | –                                                                   | 203/−53.70                                                            | ND     |
| Cyclin/Brfl-like TBP-binding protein          | AT2G01280        | Nucleus      | 1  | 3 (4/148; 7/0.629; 428/0.314)                                       | 534/−107.55                                                           | ND     |
| Unknown protein                               | AT4G01985        | EM           | 1  | 1 (13/324)                                                          | 544/−39.57                                                            | ND     |
| Extra-large GTP-binding protein 2             | AT4G34390        | PM           | 1  | 2 (217/1.298; 257/1)                                                | 843/−102.47                                                           | ND     |
| LRR receptor-like protein kinase              | AT3G24240 *      | PM           | 1  | 3 (27/0.36; 857/1.38; 1045/0.58)                                    | 1108/−66.65                                                           | SDS    |
| LRR transmembrane protein kinase              | AT5G48940 *      | PM           | 1  | 3 (857/1.214; 1079/0.414; 1083/1.444)                               | 1115/−45.34                                                           | SDS    |
| PLAC8 family protein                          | AT4G23470        | Nucleus      | 2  | 6 (43/0.769; 89/0.529; 136/0.33; 153/232; 162/2.79; 164/2.426)      | 236/−79.77                                                            | SDS    |
| Diacylglycerol kinase 7                       | AT4G30340        | PM, nucleus  | 1  | 2 (34/0.314; 142/0.324)                                             | 472/−61.23                                                            | SDS    |
| Unknown protein (DUF803)                      | AT5G11960        | Chloroplast  | 8  | 2 (6/3.719; 213/0.381)                                              | 315/−53.08                                                            | SDS    |
| Unknown protein (DUF247)                      | AT3G50180        | PM           | 2  | –                                                                   | 554/−57.86                                                            | TRIT   |

Table S2. *Cont.*

| Protein Name                                              | Accession Number                      | Localization          | TM | Number Palmitoylation Sites (Amino Acid Position/ Prediction Score) | Glycosylphosphatidyl-inositol (Amino Acid Position/ Prediction Score) | Buffer |
|-----------------------------------------------------------|---------------------------------------|-----------------------|----|---------------------------------------------------------------------|-----------------------------------------------------------------------|--------|
| Receptor-like kinase 1                                    | AT1G48480 *                           | PM, VM                | 1  | 2 (291/2.543; 621/0.4)                                              | 621/−116.41                                                           | TRIT   |
| Transferase                                               | AT5G06550                             | Nucleus               | 1  | 1 (4/3.248)                                                         | 477/−93.9                                                             | TRIT   |
| STRUBBELIG-receptor family 2                              | AT5G06820 *                           | Er                    | 1  | 2 (673/0.843; 718/1.388)                                            | 703/−503                                                              | TRIT   |
| Golgi vesicle transport associated proteins (11 proteins) |                                       |                       |    |                                                                     |                                                                       |        |
| <i>Arabidopsis</i> RAS 5                                  | AT1G02130<br>EG, EMA, NT, PTL,<br>ST  | PM, GA,<br>Vacuole    | –  | 2 (200/3.843; 201/3.479)                                            | 175/−80.34                                                            | NDSB   |
| Sec23/Sec24 transport family protein                      | AT3G23660<br>EG, EMA, IT, PTL         | COPII vesicle coat    | –  | 3 (81/0.676; 411/0.395; 412/1.372)                                  | 759/−21.93                                                            | NDSB   |
| SNARE-like superfamily protein                            | AT5G02280<br>EG, EMA                  | Cis-Golgi network, GA | –  | 1 (22/0.429)                                                        | 122/−75.64                                                            | NDSB   |
| Transport protein particle component                      | AT5G54750<br>EG, EMA                  | GA                    | –  | 2 (86/1.372; 121/1.438)                                             | 176/−80.36                                                            | NDSB   |
| Target of Myb protein 1                                   | AT5G16880<br>EMA, PTL                 | Nucleus, PM           | –  | –                                                                   | 387/−94.97                                                            | NDSB   |
| Sec24a/ER morphology 2                                    | AT3G07100<br>cST, EG, EMA, PTL        | COPII vesicle coat    | 1  | 1 (754/0.495)                                                       | 1021/−64.04                                                           | CHAPS  |
| Sec23/Sec24 transport family protein                      | AT4G14160<br>EG, PTL, IT              | Cytoplasm             | –  | 2 (90/0.546; 432/0.62)                                              | 747/−19.69                                                            | CHAPS  |
| AT-RAB GTPase homology B1C                                | AT4G17170<br>EG, EMA, IT, NT, PTL, ST | GA, PM, Vacuole       | –  | 3 (121/0.34; 209/1.46; 210/2.27)                                    | 194/−80.77                                                            | SDS    |
| Dynamin-like protein 6                                    | AT1G10290<br>EMA                      | PM, VM, cytoplasm     | –  | 2 (623/0.348; 759/0.519)                                            | 891/−48.35                                                            | SDS    |

**Table S2. Cont.**

| Protein Name                         | Accession Number          | Localization         | TM | Number Palmitoylation Sites (Amino Acid Position/ Prediction Score) | Glycosylphosphatidyl-inositol (Amino Acid Position/ Prediction Score) | Buffer |
|--------------------------------------|---------------------------|----------------------|----|---------------------------------------------------------------------|-----------------------------------------------------------------------|--------|
| Sec23/Sec24 transport family protein | AT5G43670<br>EG, EMA      | COPII vesicle coat   | –  | 1 (224/1.264)                                                       | 768/–24.71                                                            | TRIT   |
| Sorting nexin 1                      | AT5G06140<br>EMA, PTL, RT | Chloroplast, cytosol | –  | –                                                                   | 383/–36.55                                                            | TRIT   |

\* Protein also enriched in transmembrane receptor, tyrosine kinase signaling pathway; <sup>a</sup> proteins also involved in cell surface receptor linked signal transduction; EM, endomembrane; Er, extracellular region; GA, Golgi apparatus; GV, Golgi vesicle; LRR, leucine-rich repeat; PM, plasma membrane; TM, transmembrane domains; VM, vacuolar membrane; <sup>cST</sup>, Cell surface receptor linked signal transduction (GO:0007166); <sup>EG</sup>, ER to Golgi vesicle-mediated transport (GO:0006888); <sup>EMA</sup>, Establishment and maintenance of cellular localization; <sup>IT</sup>, Ion transport; <sup>NT</sup>, Nucleocytoplasmic transport (GO:0006913); <sup>PTL</sup>, Protein transport and localization; <sup>RT</sup>, Root development (GO:0048364); <sup>ST</sup>, Small GTPase mediated signal transduction (GO:0007264).

**Table S4.** Detection of palmitoylation and glycosylphosphatidylinositol modifications to myristoylated proteins.

| Protein Name                                        | Accession Number | Peptide | Location             | TM | Palmitoylated Peptide (P/S)                             | MYR Signal Peptide (P/S)                      | GPI (P/S)   | Detergent |
|-----------------------------------------------------|------------------|---------|----------------------|----|---------------------------------------------------------|-----------------------------------------------|-------------|-----------|
| Protein phosphatase 2C                              | AT2G46920        | 1       | PM                   |    | GTSRVVGC FVPSNDK<br>(11/0.376)                          | GNGTSRVVGC FVPSNDK<br>(2/0.286)               | 181/–101.28 | CHAPS     |
| Adenine nucleotide $\alpha$ hydrolases-like protein | AT3G01520        | 1       | PM                   |    | VGTVSAFCVKHA ECP<br>(150/0.648)                         | GSEPTKVMVAVNASTIK<br>(2/–1.193 twilight zone) | 154/–105.67 | CHAPS     |
| Unknown protein                                     | AT3G27210        | 1       | PM                   |    |                                                         | GSSSSSSLNNSPIRADS<br>(2/3.105)                | 214/–52.51  | CHAPS     |
| $\alpha$ -/ $\beta$ -hydrolases protein             | AT3G30380        | 1       | Extracellular        | 2  | MIRSVGFCNIDCFKP (387/1)<br>VGFCNIDCFKPTATA<br>(391/1.3) | GAVTSSMAAKFAFFPPN<br>(2/–1.246 twilight zone) | 383/–89.00  | CHAPS     |
| TRAF-like family protein                            | AT1G69650        | 1       | Chloroplast, Vacuole |    | MGASCSAPVSST (5/3.661)                                  | GASCSAPVSSTIKKNWR<br>(2/3.959)                | 274/–69.40  | ND        |
| Regulatory particle AAA-ATPase 2B                   | AT2G20140        | 1       | Cytosol, PM          |    |                                                         | GQGPGGGLNRQGDRKPD<br>(2/1.239)                | 426/–88.73  | ND        |

Table S4. *Cont.*

| Protein Name                          | Accession Number | Peptide | Location     | TM | Palmitoylated Peptide (P/S)                                                                                                                                                                            | MYR Signal Peptide (P/S)                      | GPI (P/S)   | Detergent |
|---------------------------------------|------------------|---------|--------------|----|--------------------------------------------------------------------------------------------------------------------------------------------------------------------------------------------------------|-----------------------------------------------|-------------|-----------|
| Calmodulin-binding family protein     | AT2G26190        | 1       |              |    | SPRVQVNC(532/1.355)                                                                                                                                                                                    | GLSLSLLLSAWKEVVT<br>(2/-0.743 twilight zone)  | 500/-68.75  | ND        |
| LOG2-kike ubiquitin ligase 1          | AT5G03200        | 1       |              |    | NLISLIFCCGRRQRS (10/3.162)<br>LISLIFCCGRRQRSN (11/1.429)<br>VDQYPGNCLPPPVE (58/0.602)<br>VLPCRHMCMCSGCAK (304/0.75)<br>QTNLCPVCRQPVEML (323/1.289)                                                     | GNLISLIFCCGRRQRSN<br>(2/-0.773 twilight zone) | 308/-53.61  | NDSB      |
| Serine/threonine protein kinase 3     | AT5G08160        | 1       | PM           |    | * MGCSFSGSLNA (3/1.281)                                                                                                                                                                                | GCSFSGSLNALYDAVNGGG<br>(2/1.566)              | 324/-42.85  | NDSB      |
| Tetratricopeptide repeat-like protein | AT2G17210        | 1       | Mitochondria | 1  | MGSHLCSKLQALS (6/4.289)<br>VVQSLHRCMKLDDTA<br>(704/1.162)                                                                                                                                              | GSHLCSKLQALSSKIKQ<br>(2/1.398)                | 690/-62.76  | SDS       |
| Calmodulin-domain protein kinase 9    | AT3G20410        | 1       | PM           |    | MGNCFAKNHGL (4/1.09)<br>QFGVTYLCTENSTGK<br>(108/0.405)                                                                                                                                                 | GNCFAKNHGLMKPQQNG<br>(2/1.798)                | 530/-100.47 | SDS       |
| Impaired in BABA-induced sterility 1  | AT1G18670        | 1       | PM           |    | MGCVNSKQTV (3/1.886)<br>LHKIFKLCGSPPEY (349/0.75)                                                                                                                                                      | GCVNSKQTVSVTPAIDH<br>(2/3.685)                | 681/-115.75 | TRIT      |
| Clumped chloroplasts 1                | AT1G62390        | 1       |              |    | ATVVKNHCSNEAAAT<br>(734/0.338)                                                                                                                                                                         | GKSGGRKKKSGGSNSNS<br>(2/-0.7 twilight zone)   | 736/-83.87  | TRIT      |
| Brassinosteroid-signaling kinase 7    | AT1G63500        | 1       | PM           |    | MGCEVSKLCA (3/0.867)<br>GCEVSKLCAFCVSD (9/2.028)<br>VSKLCAFCVSDPEG (12/3.62)<br>SKLCAFCVSDPEGS (13/2.167)<br>RMANLLGCCYEGEER (121/0.762)<br>MANLLGCCYEGEERL (122/1.241)<br>LIRLASRCLQYEPRE (292/0.917) | GCEVSKLCAFCVSDPE<br>(2/2.069)                 | 468/-90.93  | TRIT      |

Table S4. *Cont.*

| Protein Name                       | Accession Number | Peptide | Location | TM | Palmitoylated Peptide (P/S)    | MYR Signal Peptide (P/S)                      | GPI (P/S)  | Detergent |
|------------------------------------|------------------|---------|----------|----|--------------------------------|-----------------------------------------------|------------|-----------|
| Brassinosteroid-signaling kinase 6 | AT3G54030        | 1       | PM       |    | MGARCSKFSFCL (5/3.364)         | GARCSKFSFCLFPSHFK<br>(2/−1.018 twilight zone) | 470–3.39   | TRIT      |
|                                    |                  |         |          |    | RCSKFSFCLFPSHFK (11/2.194)     |                                               |            |           |
|                                    |                  |         |          |    | RLANLIGCCFEGEER (118/0.629)    |                                               |            |           |
|                                    |                  |         |          |    | LANLIGCCFEGEERL (119/1.176)    |                                               |            |           |
|                                    |                  |         |          |    | LVRLATRCLQYEARE<br>(289/1.028) |                                               |            |           |
| Neurofilament triplet H protein    | AT5G64690        | 1       | PM       |    | MGNCAIKPKVL (4/1.781)          | GNCAIKPKVLKDSDEDL<br>(2/0.365)                | 325/−70.82 | TRIT      |

GPI, glycosylphosphatidylinositol; MYR, myristoylation; P/S, position/score; \* Prediction of potential myristoylation sites by NMT-MYR predictor; PM, plasma membrane.
